# Supplementary material for: Towards large area production: stretchability, flexibility, and stability of efficient printed organic tandem solar cells
Source: Royal Society of Chemistry journal article supplement (doi:10.1039/d3ta04901a), 2023-01-01
Supplement: d3ta04901a1.pdf [file d3ta04901a1.pdf]

## Supporting information

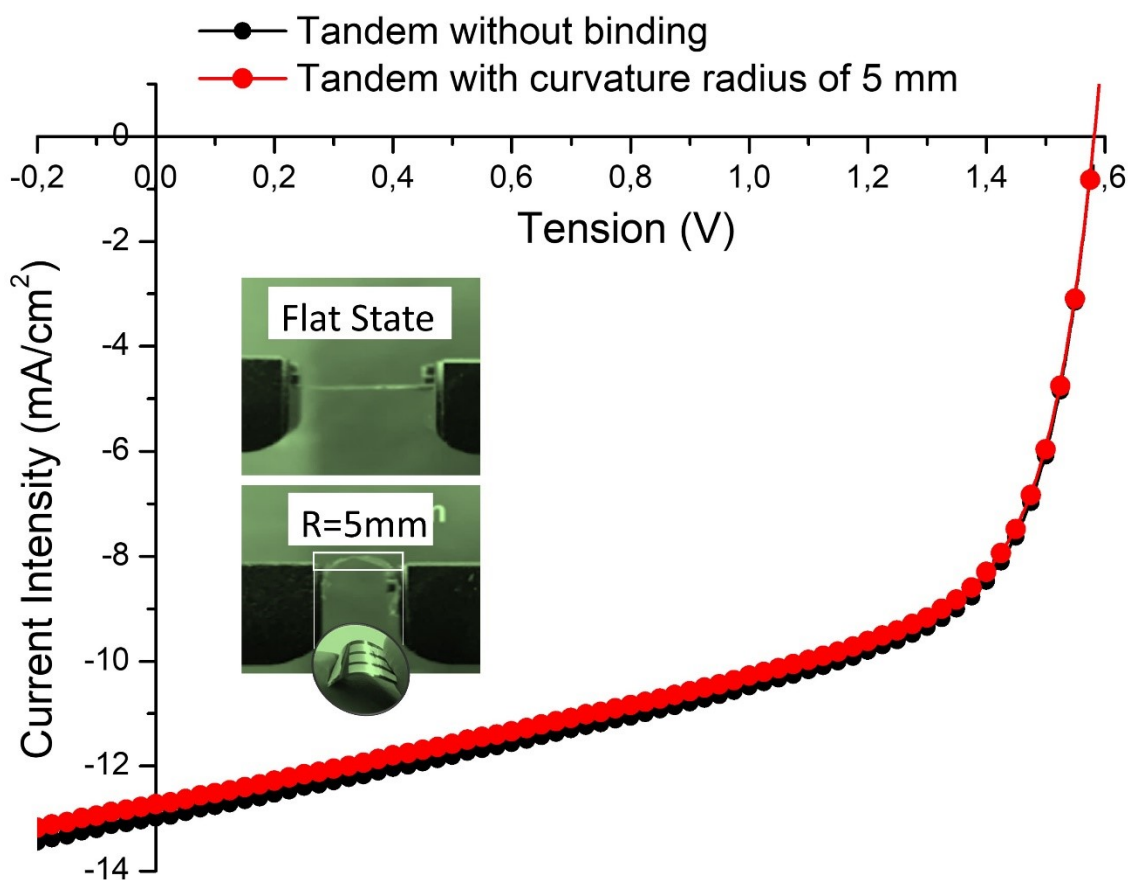

**Fig.S1:** J-V curves of tandem devices printed on PEDOT-SWCNTs-PEOT-Cellulose doped with HClO<sub>4</sub> on PET substrate as grown (black curves) and after 100 binding cycles with 5 mm of radius (red curves)

| Tandem organic solar cell                                                                                                                                       | Binding cycles                              | Voc(V)       | FF           | Jsc (mA/cm <sup>2</sup> ) | PCE (%)       |
|-----------------------------------------------------------------------------------------------------------------------------------------------------------------|---------------------------------------------|--------------|--------------|---------------------------|---------------|
| PET/PEDOT-SWNT-PEO-Cellulose doped HClO <sub>4</sub> /ZnO/P3HT-ICBA/PEDOT doped HClO <sub>4</sub> /ZnO/PTB7-th :[71] PCBM/MoOx doped with HClO <sub>4</sub> /Ag | As grown                                    | 1.59 (±0.01) | 0.62 (±0.01) | 13.15 (±0.012)            | 13.05 (±0.05) |
|                                                                                                                                                                 | After 100 binding cycles with 5mm of radius | 1.59 (±0.01) | 0.62 (±0.01) | 13.09 (±0.012)            | 12.95 (±0.08) |

**Table.S1:** table value of photovoltaics parameters of organic tandem devices printed on PEDOT-SWCNT-PEO-Cellulose doped with HClO<sub>4</sub> on PET as grown and after 100 binding cycles with 5 mm of radius.
